# Supplementary material for: Magnetic resonance image tissue classification using an automatic method
Source: Springer Nature journal article supplement (doi:10.1186/s13000-014-0207-7), 2014-12-01
Supplement: MOESM13 [file 9771654]

**Table 1**  
Quantitative mean K-index and standard deviation results of 18 real images from IBSR dataset

| Methods         | White matter (%) |                    | Grey matter (%) |                    |
|-----------------|------------------|--------------------|-----------------|--------------------|
|                 | Mean             | Standard deviation | Mean            | Standard deviation |
| EM              | 86.01            | 2.24               | 74.47           | 5.57               |
| SPM 5           | 85.30            | 3.90               | 74.93           | 13.88              |
| HMC             | 86.91            | 1.67               | 76.18           | 5.81               |
| NL- FCM         | 84.83            | 3.87               | 74.82           | 4.26               |
| FCM             | 85.21            | 3.74               | 78.91           | 4.43               |
| Proposed-Method | 88.09            | 1.58               | 80.35           | 4.01               |
