# Supplementary material for: Magnetic resonance image tissue classification using an automatic method
Source: Springer Nature journal article supplement (doi:10.1186/s13000-014-0207-7), 2014-12-01
Supplement: MOESM14 [file 9771654]

**Table 2**

Application of different methods on the 18 Brainweb T1-weighted images with different Rician noise levels and a 20% inhomogeneity

| Methods         | White matter (%) |       |      |      |      | Grey matter (%) |      |      |      |      |      |      |
|-----------------|------------------|-------|------|------|------|-----------------|------|------|------|------|------|------|
|                 | Noise Level      | 0     | 1    | 5    | 7    | 9               | 0    | 1    | 3    | 5    | 7    | 9    |
| EM              |                  | 86.1  | 91.5 | 92.2 | 90.1 | 86.4            | 83.1 | 90.8 | 92.5 | 92   | 89.1 | 84.2 |
| SPM 5           |                  | 91.05 | 94.2 | 93.6 | 90.2 | 86.3            | 91.2 | 93.4 | 93.3 | 92.1 | 90   | 86.6 |
| HMC             |                  | 97.8  | 95.7 | 93.9 | 937  | 91.7            | 97   | 94.5 | 95.9 | 93.8 | 92.7 | 91.1 |
| NL-FCM          |                  | 95.6  | 94.2 | 91.5 | 89.8 | 83.2            | 95.4 | 94.1 | 93.8 | 92.9 | 89.9 | 79.3 |
| FCM             |                  | 97.1  | 96   | 92   | 88   | 84              | 97   | 96   | 91   | 86   | 87   | 83   |
| Proposed-Method |                  | 96.8  | 94.9 | 93.7 | 93.9 | 92.1            | 95.7 | 95.4 | 92.8 | 92.6 | 92.1 | 91.2 |
